# Supplementary material for: Effects of Urban Greenway Environmental Types and Landscape Characteristics on Physical and Mental Health Restoration
Source: MDPI journal article supplement (doi:10.3390/f15040679), 2024-04-09
Supplement: s1 [file s1]

# Supplementary Materials

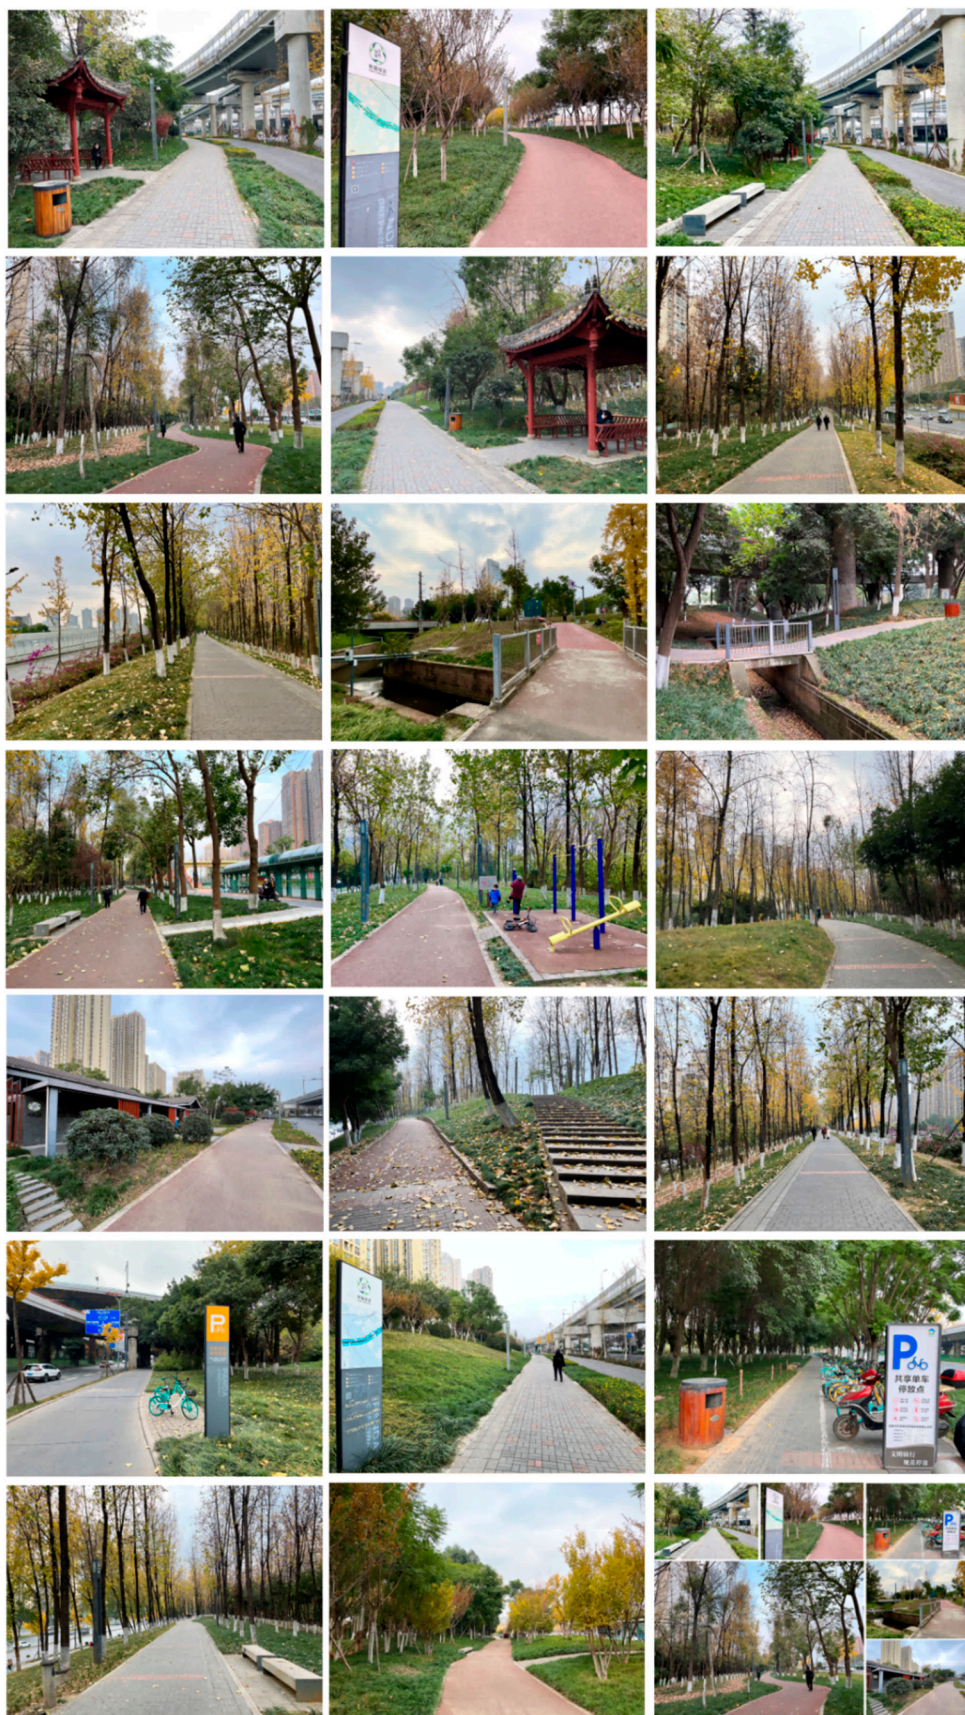

(a)



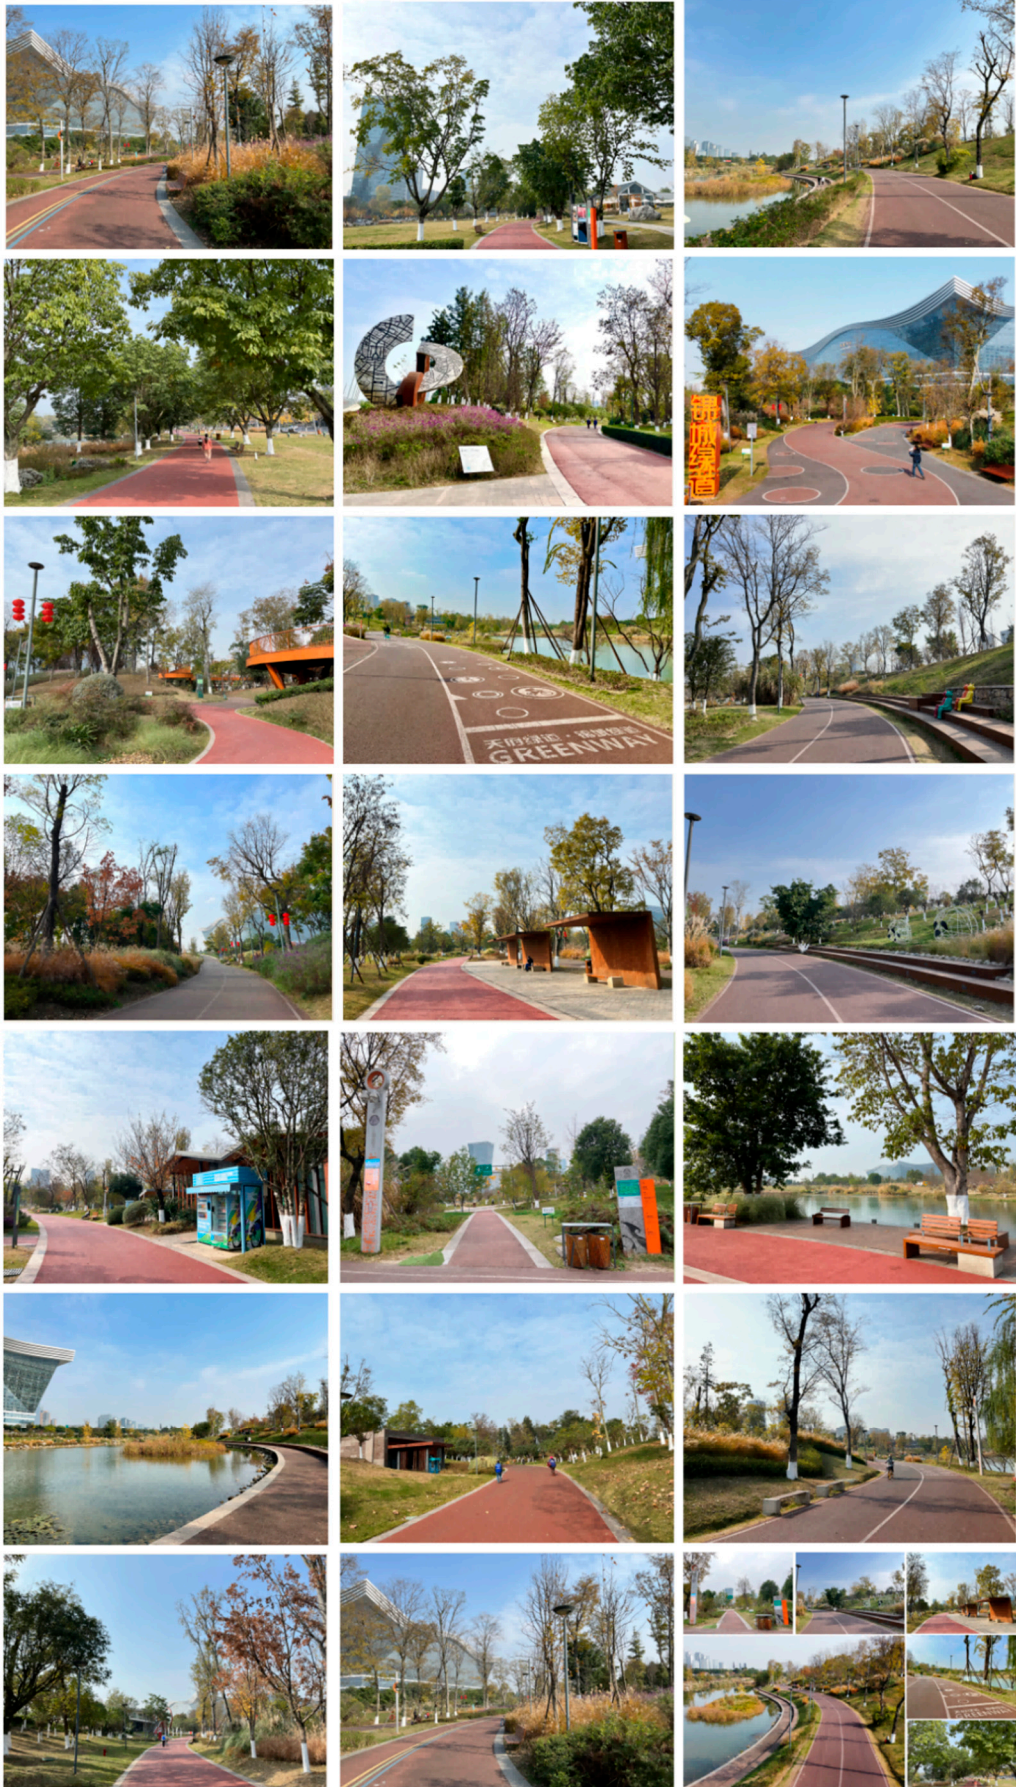

(b)



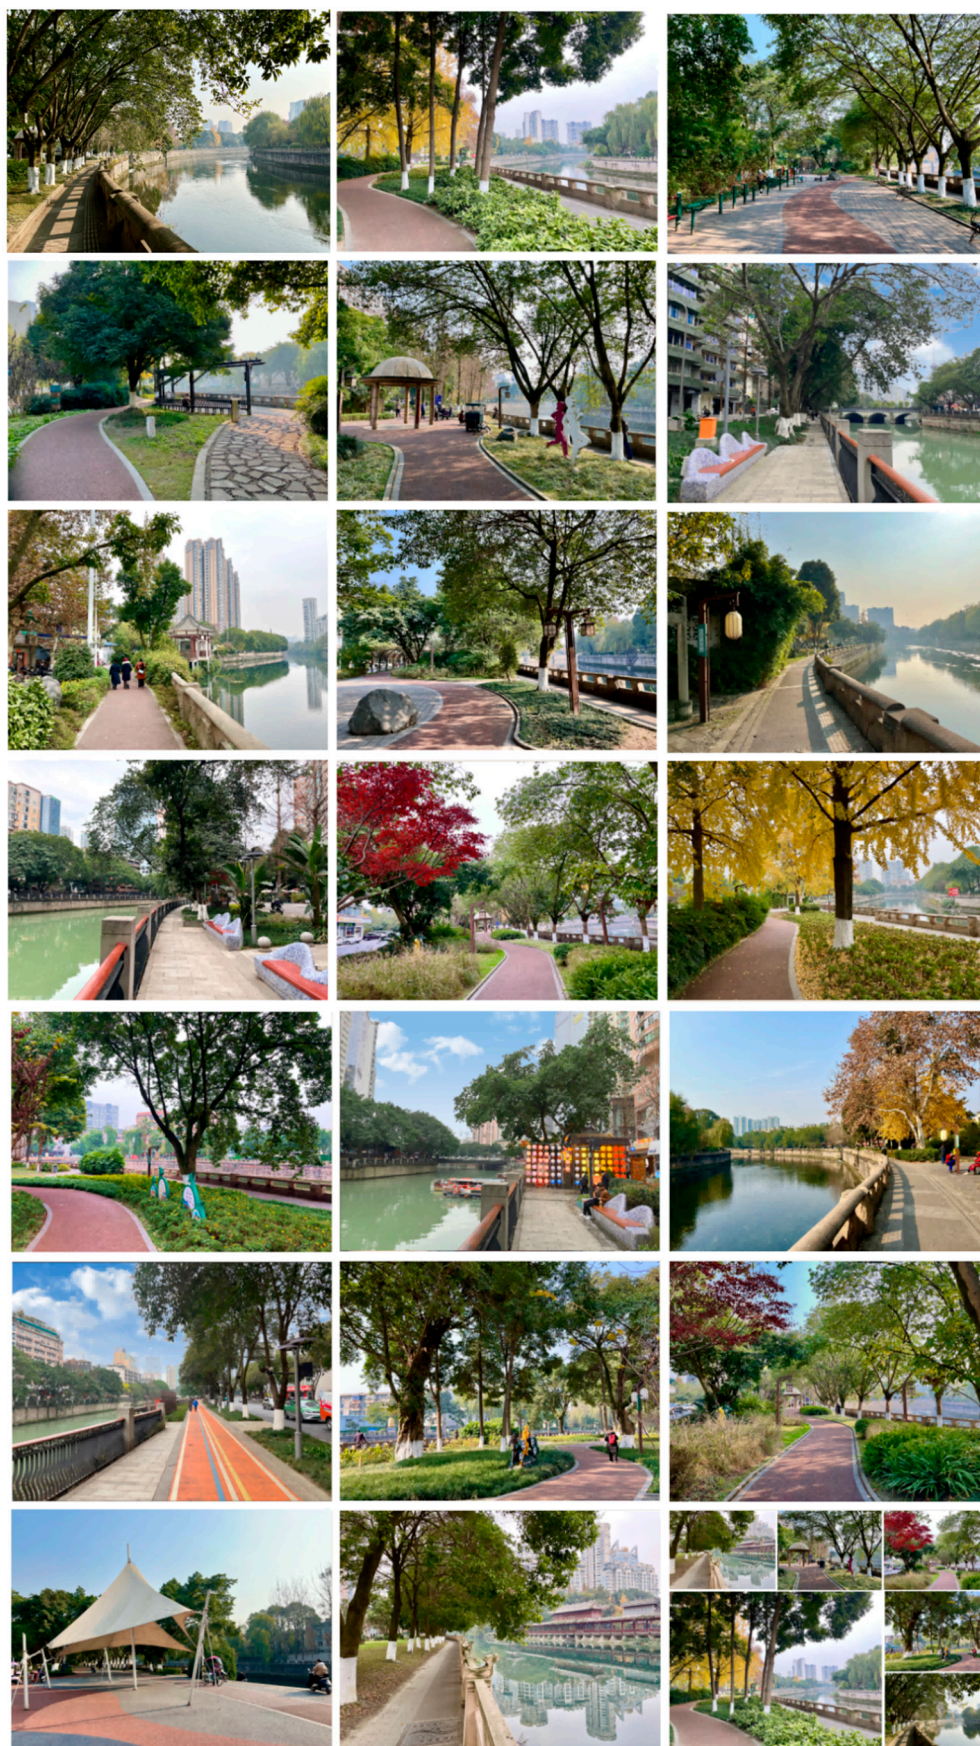

(c)

**Figure S1.** Three types of urban greenway experiment pictures. (a) Urban road type greenway experiment pictures. (b) Urban park type greenway experiment pictures. (c) Urban river type greenway experiment pictures.

**Table S1.** Greenway Environmental Characteristics Perception Scale.

Name:

Date:

Space Number:

Please complete the following questionnaire regarding your perception of environmental characteristics. Rate each item on a scale from 1 to 5, where 5 represents strongly agree and 1 represents strongly disagree. Please **CIRCLE THE NUMBER THAT BEST DESCRIBES HOW YOU FEEL RIGHT NOW.**

|            |                                                                                  | Environmental Characteristics Perception |   |   |   |   |
|------------|----------------------------------------------------------------------------------|------------------------------------------|---|---|---|---|
| Vegetation | Rich plant species                                                               | 1                                        | 2 | 3 | 4 | 5 |
|            | Rich plant colours                                                               | 1                                        | 2 | 3 | 4 | 5 |
|            | Rich plant layers                                                                | 1                                        | 2 | 3 | 4 | 5 |
|            | Good vegetation shading effect                                                   | 1                                        | 2 | 3 | 4 | 5 |
| Water Body | High aesthetic quality of the water body                                         | 1                                        | 2 | 3 | 4 | 5 |
|            | Good water affinity                                                              | 1                                        | 2 | 3 | 4 | 5 |
|            | Soft water shoreline                                                             | 1                                        | 2 | 3 | 4 | 5 |
| Pathways   | Suitable pathway width                                                           | 1                                        | 2 | 3 | 4 | 5 |
|            | High pathway comfort                                                             | 1                                        | 2 | 3 | 4 | 5 |
|            | Suitable pathway slope                                                           | 1                                        | 2 | 3 | 4 | 5 |
|            | Well-maintained pathway paving                                                   | 1                                        | 2 | 3 | 4 | 5 |
|            | Low interference from vehicular traffic                                          | 1                                        | 2 | 3 | 4 | 5 |
| Facilities | Adequate service facilities<br>(benches, pavilions, sales points, toilets, etc.) | 1                                        | 2 | 3 | 4 | 5 |
|            | Well-maintained service facilities                                               | 1                                        | 2 | 3 | 4 | 5 |
|            | Comprehensive signage system<br>(signs, markings, etc.)                          | 1                                        | 2 | 3 | 4 | 5 |
|            | Clear and prominent signage                                                      | 1                                        | 2 | 3 | 4 | 5 |
| Ornaments  | Abundance of landscape ornaments                                                 | 1                                        | 2 | 3 | 4 | 5 |
|            | High aesthetic value of landscape ornaments                                      | 1                                        | 2 | 3 | 4 | 5 |

PLEASE BE SURE YOU HAVE ANSWERED EVERY ITEM.

**Table S2.** Short-version revised Perceived Restorativeness Scale (PRS).

Name:

Date:

Space Number:

Please complete the following questionnaire about your restorative experience on a scale from 0 to 7, where 7 represented the highest positive rating and 1 the lowest rating. Please **CIRCLE THE NUMBER THAT BEST DESCRIBES HOW YOU FEEL RIGHT NOW.**

|                                                                    | Restorative Experience |   |   |   |   |   |   |
|--------------------------------------------------------------------|------------------------|---|---|---|---|---|---|
| 1. Being here is an escape experience.                             | 1                      | 2 | 3 | 4 | 5 | 6 | 7 |
| 2. Spending time here gives me a break from my day-to-day routine. | 1                      | 2 | 3 | 4 | 5 | 6 | 7 |
| 3. It is a place to get away from it all.                          | 1                      | 2 | 3 | 4 | 5 | 6 | 7 |
| 4. Being here helps me release my tension.                         | 1                      | 2 | 3 | 4 | 5 | 6 | 7 |
| 5. This place makes me feel free from work and daily life.         | 1                      | 2 | 3 | 4 | 5 | 6 | 7 |
| 6. The surrounding scenery here is in harmony.                     | 1                      | 2 | 3 | 4 | 5 | 6 | 7 |
| 7. I'm quite curious about the unseen views in the scenery here.   | 1                      | 2 | 3 | 4 | 5 | 6 | 7 |
| 8. Coming here helps me make many good associations.               | 1                      | 2 | 3 | 4 | 5 | 6 | 7 |
| 9. The elements of the landscape are matched here.                 | 1                      | 2 | 3 | 4 | 5 | 6 | 7 |
| 10. This place has fascinating qualities.                          | 1                      | 2 | 3 | 4 | 5 | 6 | 7 |
| 11. There is much to explore and discover here.                    | 1                      | 2 | 3 | 4 | 5 | 6 | 7 |
| 12. The setting is fascinating.                                    | 1                      | 2 | 3 | 4 | 5 | 6 | 7 |
| 13. I want to spend more time looking at the surroundings.         | 1                      | 2 | 3 | 4 | 5 | 6 | 7 |
| 14. I can do things I like here.                                   | 1                      | 2 | 3 | 4 | 5 | 6 | 7 |
| 15. Being here suits my personality                                | 1                      | 2 | 3 | 4 | 5 | 6 | 7 |
| 16. I have a sense that I belong here.                             | 1                      | 2 | 3 | 4 | 5 | 6 | 7 |
| 17. I can find ways to enjoy myself here.                          | 1                      | 2 | 3 | 4 | 5 | 6 | 7 |
| 18. It is easy to find my way around here.                         | 1                      | 2 | 3 | 4 | 5 | 6 | 7 |

PLEASE BE SURE YOU HAVE ANSWERED EVERY ITEM.

**Table S3.** The Positive and Negative Affect Schedule (PANAS).

Name:

Date:

Space Number:

This scale consists of words that describe different feelings and emotions. Please  
**CIRCLE THE NUMBER THAT BEST DESCRIBES HOW YOU FEEL RIGHT NOW.**

THANK YOU FOR YOUR COOPERATION

|     |              | Very Slightly or<br>Not at All | A Little | Moderately | Quite a Bit | Extremely |
|-----|--------------|--------------------------------|----------|------------|-------------|-----------|
| 1.  | Interested   | 1                              | 2        | 3          | 4           | 5         |
| 2.  | Distressed   | 1                              | 2        | 3          | 4           | 5         |
| 3.  | Excited      | 1                              | 2        | 3          | 4           | 5         |
| 4.  | Upset        | 1                              | 2        | 3          | 4           | 5         |
| 5.  | Strong       | 1                              | 2        | 3          | 4           | 5         |
| 6.  | Guilty       | 1                              | 2        | 3          | 4           | 5         |
| 7.  | Scared       | 1                              | 2        | 3          | 4           | 5         |
| 8.  | Hostile      | 1                              | 2        | 3          | 4           | 5         |
| 9.  | Enthusiastic | 1                              | 2        | 3          | 4           | 5         |
| 10. | Proud        | 1                              | 2        | 3          | 4           | 5         |
| 11. | Irritable    | 1                              | 2        | 3          | 4           | 5         |
| 12. | Alert        | 1                              | 2        | 3          | 4           | 5         |
| 13. | Ashamed      | 1                              | 2        | 3          | 4           | 5         |
| 14. | Inspired     | 1                              | 2        | 3          | 4           | 5         |
| 15. | Nervous      | 1                              | 2        | 3          | 4           | 5         |
| 16. | Determined   | 1                              | 2        | 3          | 4           | 5         |
| 17. | Attentive    | 1                              | 2        | 3          | 4           | 5         |
| 18. | Jittery      | 1                              | 2        | 3          | 4           | 5         |
| 19. | Active       | 1                              | 2        | 3          | 4           | 5         |
| 20. | Afraid       | 1                              | 2        | 3          | 4           | 5         |

PLEASE BE SURE YOU HAVE ANSWERED EVERY ITEM.
